# Supplementary material
Source: ML conference proceedings conference paper supplement (https://proceedings.mlr.press/v89/ding19a.html)
Supplement: Supplementary file [file ding19a-supp.pdf]

## 8 Supplementary Materials

### 8.1 Proofs

#### 8.1.1 Proof of Lemma 1

*Proof.* We use *law of iterated expectation* to prove the conclusion. We first compute

$$\begin{aligned} E[x_{jb}|t] &= \text{sgn}(w_t h_{jt}) P(j|t) \\ &= \text{sgn}(w_t h_{jt}) \frac{|h_{jt}|}{\sum_{j=1}^n |h_{jt}|} \\ &= \text{sgn}(w_t h_{jt}) \frac{|w_t h_{jt}|}{\sum_{j=1}^n |w_t h_{jt}|} \\ &= \frac{w_t h_{jt}}{\sum_{j=1}^n |w_t h_{jt}|}. \end{aligned}$$

This gives us:

$$\begin{aligned} E[x_{jb}] &= E[E[x_{jb}|t]] = E\left[\frac{w_t h_{jt}}{\sum_{j=1}^n |w_t h_{jt}|}\right] \\ &= \sum_{t=1}^d \frac{w_t h_{jt}}{\sum_{j=1}^n |w_t h_{jt}|} P(t|\mathbf{w}) \\ &= \sum_{t=1}^d \frac{w_t h_{jt}}{\sum_{j=1}^n |w_t h_{jt}|} \frac{\sum_{j=1}^n |w_t h_{jt}|}{\sum_{t=1}^d \sum_{j=1}^n |w_t h_{jt}|} \\ &= \frac{\sum_{t=1}^d w_t h_{jt}}{\sum_{t=1}^d \sum_{j=1}^n |w_t h_{jt}|} \\ &= \frac{\mathbf{w}^T \mathbf{h}_j}{\sum_{t=1}^d \sum_{j=1}^n |w_t h_{jt}|} = \frac{c_j}{S}. \end{aligned}$$

Therefore,  $E[x_j] = E[\sum_{b=1}^B x_{jb}] = \frac{Bc_j}{S}$ .  $\square$

#### 8.1.2 Proof of Lemma 2

*Proof.* We still use *law of iterated expectation* to prove the conclusion and it is basically very similar to the proof of Lemma 1.

$$\begin{aligned} &E[(x_{jb} - x_{mb})^2|t] \\ &= [\text{sgn}(w_t h_{jt}) - 0]^2 P(j|t) + [0 - \text{sgn}(w_t h_{mt})]^2 P(m|t) \\ &= [\text{sgn}(w_t h_{jt})]^2 \frac{|h_{jt}|}{\sum_{j=1}^n |h_{jt}|} \\ &\quad + [\text{sgn}(w_t h_{mt})]^2 \frac{|h_{mt}|}{\sum_{j=1}^n |h_{jt}|} \\ &= [\text{sgn}(w_t h_{jt})]^2 \frac{|w_t h_{jt}|}{\sum_{j=1}^n |w_t h_{jt}|} \\ &\quad + [\text{sgn}(w_t h_{mt})]^2 \frac{|w_t h_{mt}|}{\sum_{j=1}^n |w_t h_{jt}|} \\ &= \frac{|w_t h_{jt}| + |w_t h_{mt}|}{\sum_{j=1}^n |w_t h_{jt}|}. \end{aligned}$$

This gives us:

$$\begin{aligned} E[(x_{jb} - x_{mb})^2] &= E\{E[(x_{jb} - x_{mb})^2|t]\} \\ &= \sum_{t=1}^d \frac{|w_t h_{jt}| + |w_t h_{mt}|}{\sum_{j=1}^n |w_t h_{jt}|} P(t|\mathbf{w}) \\ &= \frac{\sum_{t=1}^d (|w_t h_{jt}| + |w_t h_{mt}|)}{\sum_{t=1}^d \sum_{j=1}^n |w_t h_{jt}|} \\ &= \frac{a_j + a_m}{S}. \end{aligned}$$

Note that for each iteration  $b$ ,  $x_{jb} - x_{mb}$  is independently and identically distributed, so we have

$$\begin{aligned} \text{Var}(x_j - x_m) &= B \text{Var}(x_{jb} - x_{mb}) \\ &= B \{E[(x_{jb} - x_{mb})^2] - [E(x_{jb} - x_{mb})]^2\} \\ &= B \left[ \frac{a_j + a_m}{S} - \frac{(c_j - c_m)^2}{S^2} \right]. \end{aligned}$$

$\square$

#### 8.1.3 Proof of Theorem 1

*Proof.* For some  $j$ , we know that  $x_{jb}$  and  $x_{mb}$  cannot be non-zero simultaneously. Therefore, all  $(x_{jb} - x_{mb})$ 's independently take values in  $[-1, 1]$ . We use Bennett's Inequality in (Bennett, 1962) to bound the probability of  $P(x_j \geq x_m)$  for some  $j \in \{c_j < c_m\}$ .

$$\begin{aligned} P(x_j \geq x_m) &= P(x_j - x_m \geq 0) \\ &= P\left\{\sum_{b=1}^B (x_{jb} - x_{mb}) \geq 0\right\} \\ &= P(Y \geq y), \end{aligned} \tag{8}$$

where  $Y_b = x_{jb} - x_{mb} - \frac{c_j - c_m}{S}$ ,  $Y = \sum_{b=1}^B Y_b$  and  $y = \frac{B(c_m - c_j)}{S}$ . It is obvious that  $Y_b \leq 1 - \frac{c_j - c_m}{S}$  almost surely.

We denote  $q = 1 - \frac{c_j - c_m}{S}$  and we compute a few quantities needed in Bennett's Inequality below:

$$\begin{aligned} \Sigma_j^2 &:= B E Y_b^2 = \text{Var}(x_j - x_m) = B \sigma_j^2, \\ qy &= B \frac{(S + c_m - c_j)(c_m - c_j)}{S^2} = B T_j, \\ \frac{qy}{\Sigma_j^2} &= \frac{T_j}{\sigma_j^2}, \\ \frac{T_j}{\sigma_j^2} &= \frac{(S + c_m - c_j)(c_m - c_j)}{S(a_j + a_m) - (c_m - c_j)^2}. \end{aligned} \tag{9}$$

From Bennett's Inequality, we can bound Equation (8):

$$\begin{aligned} &P(Y \geq y) \\ &\leq \exp\left\{-\frac{\Sigma_j^2}{q^2} \left[ \left(1 + \frac{qy}{\Sigma_j^2}\right) \log\left(1 + \frac{qy}{\Sigma_j^2}\right) - \frac{qy}{\Sigma_j^2} \right]\right\} \\ &= \exp\left\{-B M_j \sigma_j^2 \left[ \left(1 + \frac{T_j}{\sigma_j^2}\right) \log\left(1 + \frac{T_j}{\sigma_j^2}\right) - \frac{T_j}{\sigma_j^2} \right]\right\} \end{aligned}$$

If we want  $P(Y \geq y) \leq \frac{\delta}{n'}$ , then it is equivalent to

$$BM_j \sigma_j^2 \left[ \left(1 + \frac{T_j}{\sigma_j^2}\right) \log\left(1 + \frac{T_j}{\sigma_j^2}\right) - \frac{T_j}{\sigma_j^2} \right] \geq \log \frac{n'}{\delta}.$$

Before proceeding to the result, we need to show that  $(1 + \frac{T_j}{\sigma_j^2}) \log(1 + \frac{T_j}{\sigma_j^2}) - \frac{T_j}{\sigma_j^2} > 0$ . Denote  $v = \frac{T_j}{\sigma_j^2}$  and  $g_1(v) = (1+v) \log(1+v) - v$ . Then  $g_1'(v) = 1 + \log(1+v) - 1 = \log(1+v) > 0$  when  $v > 0$ . So  $g_1(v) > g_1(0) = 0$  when  $v > 0$ . It is not hard to see that  $\frac{T_j}{\sigma_j^2} > 0$  from (9) for all  $j \in \{c_j < c_m\}$ . Therefore,

$$B \geq \frac{1}{M_j \sigma_j^2 \left[ \left(1 + \frac{T_j}{\sigma_j^2}\right) \log\left(1 + \frac{T_j}{\sigma_j^2}\right) - \frac{T_j}{\sigma_j^2} \right]} \log \frac{n'}{\delta}. \quad (10)$$

So far, we have proved that when  $B$  satisfies equation (6),  $P(x_j \geq x_m) \leq \frac{\delta}{n'}$  for some  $j \in \{j : c_j < c_m\}$ . Since  $\#\{j : c_j < c_m\} = n'$ , we have when  $B$  satisfies equation (6) for all  $j \in \{j : c_j < c_m\}$ , the following holds:

$$\begin{aligned} & P(x_m > x_j, \forall j \in \{c_j < c_m\}) \\ &= 1 - P(x_m \leq x_j, \exists j \in \{c_j < c_m\}) \\ &\geq 1 - n' \frac{\delta}{n'} = 1 - \delta. \end{aligned}$$

It is worthwhile to notice that  $M_j \sim O(1)$ ,  $T_j \sim O(\lambda)$  and  $O(\lambda) \leq \sigma_j^2 \leq O(d\lambda)$  for all  $j \in \{j : c_j < c_m\}$ . Denote  $g_2(\sigma_j^2, T_j) = (\sigma_j^2 + T_j) \log(1 + \frac{T_j}{\sigma_j^2}) - T_j$ , then  $\frac{\partial g_2}{\partial \sigma_j^2} = \log(1 + \frac{T_j}{\sigma_j^2}) - \frac{T_j}{\sigma_j^2} < 0$ . So  $g_2(\sigma_j^2, T_j) \geq O(g_2(d\lambda, T_j)) = O(\frac{\lambda}{d})$ . Therefore, the r.h.s. of Equation (10) is  $\frac{1}{M_j g_2(\sigma_j^2, T_j)} \log \frac{n'}{\delta} \leq O(\frac{d}{\lambda} \log \frac{n'}{\delta})$ . This implies  $B \sim O(\frac{d}{\lambda} \log n')$  is sufficient.  $\square$

#### 8.1.4 Proof of Theorem 2

*Proof.* Take  $m = \arg \max_{i=1, \dots, n} c_i$ . Since  $w_t h_{jt} \geq 0, \forall j, t$ , so  $S = \sum_{i=1}^n c_i$ .

Since  $C = B$ , not identifying maximum inner product is equivalent to index  $m$  not sampled within  $B$  samples. And we know that  $P(\text{index } m \text{ sampled in a step}) = \frac{c_m}{S}$ . Denote  $A = \{\text{index } m \text{ not sampled within } B \text{ samples}\}$ , then

for any  $\alpha \in (0, \frac{1}{2})$ ,

$$\begin{aligned} & P(\text{not identifying maximum inner product}) \\ &= E[\mathbf{1}(A)] = E[E[\mathbf{1}(A) | \frac{c_m}{S}]] \\ &= E\left[\left(1 - \frac{c_m}{S}\right)^B\right] \leq E[\exp\left(-B \frac{c_m}{S}\right)] \\ &= E\left[\exp\left(-\frac{B c_m}{S}\right) \mathbf{1}\left(\frac{c_m}{S} > n^{-1} \alpha \log n\right)\right] \\ &\quad + E\left[\exp\left(-\frac{B c_m}{S}\right) \mathbf{1}\left(\frac{c_m}{S} \leq n^{-1} \alpha \log n\right)\right] \\ &\leq E[\exp(-B n^{-1} \alpha \log n)] + P\left(\frac{c_m}{S} \leq n^{-1} \alpha \log n\right) \\ &\leq n^{-\rho} + P\left(\frac{c_m}{S} \leq n^{-1} \alpha \log n\right). \end{aligned} \quad (11)$$

For any  $\alpha \in (0, \frac{1}{2})$  and  $\forall \epsilon > 0$ ,

$$\begin{aligned} & P\left(\frac{c_m}{S} > n^{-1} \alpha \log n\right) = P(c_m > n^{-1} S \alpha \log n) \\ &\geq P(c_m > n^{-1} S \alpha \log n, n^{-1} S \leq \beta^{-1} + \epsilon) \\ &= P(c_m > n^{-1} S \alpha \log n | n^{-1} S \leq \beta^{-1} + \epsilon) \\ &\quad P(n^{-1} S \leq \beta^{-1} + \epsilon) \\ &\geq P(c_m > (\beta^{-1} + \epsilon) \alpha \log n) P(n^{-1} S \leq \beta^{-1} + \epsilon) \end{aligned}$$

Since  $c_j \stackrel{iid}{\sim} \text{Exp}(\beta)$ ,  $E[S] = nE[c_j] = n\beta^{-1}$ ,  $\text{Var}[S] = n\text{Var}[c_j] = \frac{n}{\beta^2}$ . According to Chebyshev's Inequality,  $\forall \epsilon > 0$ ,

$$\begin{aligned} & P(n^{-1} S \leq \beta^{-1} + \epsilon) = 1 - P(n^{-1} S - \beta^{-1} \geq \epsilon) \\ &\geq 1 - P(|n^{-1} S - \beta^{-1}| \geq \epsilon) \\ &\geq 1 - \frac{\text{Var}[n^{-1} S]}{\epsilon^2} = 1 - \frac{1}{n\beta^2 \epsilon^2}. \end{aligned} \quad (12)$$

Since  $c_j \stackrel{iid}{\sim} \text{Exp}(\beta)$ , we have for  $\alpha \in (0, \frac{1}{2})$ ,

$$\begin{aligned} & P(c_m > (\beta^{-1} + \epsilon) \alpha \log n) \\ &= 1 - P(c_m \leq (\beta^{-1} + \epsilon) \alpha \log n) \\ &= 1 - [1 - e^{-\beta(\beta^{-1} + \epsilon) \alpha \log n}]^n \\ &= 1 - \left(1 - \frac{1}{n(1 + \beta \epsilon) \alpha}\right)^n \\ &\sim 1 - e^{-n^{1-(1+\beta \epsilon) \alpha}}. \end{aligned} \quad (13)$$

Since it holds for any  $\epsilon > 0$ , we can take  $\epsilon = \beta^{-1}$ , then from Equation (12, 13), we have

$$\begin{aligned} & P\left(\frac{c_m}{S} > n^{-1} \alpha \log n\right) \\ &\geq \left(1 - \frac{1}{n\beta^2 \epsilon^2}\right) \left(1 - e^{-n^{1-(1+\beta \epsilon) \alpha}}\right) \\ &= \left(1 - \frac{1}{n}\right) \left(1 - e^{-n^{1-2\alpha}}\right). \end{aligned} \quad (14)$$

From Equation (11), we know:

$$\begin{aligned}
& P(\text{not identifying maximum inner product}) \\
& \leq n^{-\rho} + 1 - \left(1 - \frac{1}{n}\right)(1 - e^{-n^{1-2\alpha}}) \\
& \sim O\left(\frac{1}{n^\rho}\right).
\end{aligned}$$

□

### 8.1.5 Proof of Corollary 1

*Proof.* Assume  $E(c_j) = \beta^{-1} > 0$  and  $\text{Var}[c_j] = \gamma^{-2}$ , then for any  $\epsilon > 0$ , the following equation still holds.

$$\begin{aligned}
& P(n^{-1}S \leq \beta^{-1} + \epsilon) = 1 - P(n^{-1}S - \beta^{-1} \geq \epsilon) \\
& \geq 1 - P(|n^{-1}S - \beta^{-1}| \geq \epsilon) \\
& \geq 1 - \frac{\text{Var}[n^{-1}S]}{\epsilon^2} = 1 - \frac{1}{n\gamma^2\epsilon^2}.
\end{aligned} \tag{15}$$

Take  $\epsilon = \gamma^{-1}$  in the above equation, we have

$$P(n^{-1}S \leq \beta^{-1} + \epsilon) > 1 - \frac{1}{n}. \tag{16}$$

Since  $c_i$  is heavy-tailed, so for all  $\mu > 0$ , there exists  $x_0 > 0$ , such that for all  $x \geq x_0$ ,

$$P(c_i \geq x) \geq e^{-\mu x}. \tag{17}$$

Take  $\mu = \frac{1}{\beta^{-1} + \epsilon}$ , when  $(\beta^{-1} + \epsilon)\alpha \log n \geq x_0$ , we have

$$\begin{aligned}
& P(c_m > (\beta^{-1} + \epsilon)\alpha \log n) \\
& = 1 - P(c_m \leq (\beta^{-1} + \epsilon)\alpha \log n) \\
& = 1 - \left(P(c_i \leq (\beta^{-1} + \epsilon)\alpha \log n)\right)^n \\
& \geq 1 - \left(1 - e^{-\mu(\beta^{-1} + \epsilon)\alpha \log n}\right)^n \\
& = 1 - \left(1 - e^{-\alpha \log n}\right)^n \\
& \sim 1 - e^{-n^{1-\alpha}}.
\end{aligned} \tag{18}$$

From Equation (12, 16, 18), we know that

$$P\left(\frac{C_m}{S} > n^{-1}\alpha \log n\right) \geq \left(1 - \frac{1}{n}\right)(1 - e^{-n^{1-\alpha}}).$$

From the proof of Theorem 2, we know the result of Corollary 1 holds. □

## 8.2 More comparison of experimental results

In order to get more informative comparisons, we summarize the results from Figure 3 in the following tables. Prec@1 and Prec@5 of MovieLens with  $d = 50$  are shown in Table 1 and 2 respectively. From the results, we can see that Sampling-MIPS algorithm outperforms PCA-MIPS, LSH-MIPS and Diamond-MSIPS consistently on

this dataset. Prec@1 and Prec@5 of Netflix with  $d = 50$  are shown in Table 3 and 4 respectively. Note that the speedup of PCA-tree method depends on the depth of the PCA tree, which is corresponding to the number of candidates in each leaf node. A deeper PCA tree leads to a higher speedup with a tradeoff of a lower precision. The maximum depth in our experiment is too small to generate a point with a speedup greater than 5. This is the reason that in Table 3 and 4, there are no results shown for PCA-MIPS. But we can see from Figure 3 that with the current maximum depth chosen, the precision of PCA-MIPS is drastically reduced to almost 0 when speedup is less than 5. So with a bigger maximum depth, the result of PCA-MIPS will get even worst.

Table 1: Result of prec@1 for MovieLens ( $d = 50$ )

| Speedup (prec@1) | 5      | 10     | 20     |
|------------------|--------|--------|--------|
| Sampling-MIPS    | 99.95% | 99.65% | 65%    |
| Diamond          | 68.35% | 42.25% | 25.85% |
| PCA              | 0.15%  | 0.00%  | 0.00%  |
| LSH              | 4.75%  | 18.9%  | 0.05%  |

Table 2: Result of prec@5 for MovieLens ( $d = 50$ )

| Speedup (prec@5) | 5      | 10    | 20    |
|------------------|--------|-------|-------|
| Sampling-MIPS    | 87.38% | 72%   | 13%   |
| Diamond          | 11.65% | 5.41% | 1.52% |
| PCA              | 0.00%  | 0.00% | 0.00% |
| LSH              | 9.73%  | 4.81% | 0.00% |

Table 3: Result of prec@1 for Netflix ( $d = 50$ )

| Speedup (prec@1) | 5      | 10     | 20     |
|------------------|--------|--------|--------|
| Sampling-MIPS    | 97.30% | 77.15% | 29.80% |
| Diamond          | 51.85% | 31.4%  | 15.2%  |
| PCA              | NA     | NA     | NA     |
| LSH              | 23%    | 1.05%  | NA%    |

Table 4: Result of prec@5 for Netflix ( $d = 50$ )

| Speedup (prec@5) | 5      | 10    | 20    |
|------------------|--------|-------|-------|
| Sampling-MIPS    | 58.87% | 28.7% | 7.98% |
| Diamond          | 14.47% | 7.26% | 3.29% |
| PCA              | NA     | NA    | NA    |
| LSH              | 9.25%  | 0.29% | NA%   |

### 8.3 Extension to Maximum All-pair Dot-product (MAD) Search

#### 8.3.1 Proposed algorithm for MAD Search

Our Sampling-MIPS algorithm can also be extended to solve the Maximum All-pair Dot-product (MAD) search problem. Instead of finding the maximum inner product for a specific query, MAD aims to find the maximum inner product over a set of  $m$  queries and  $n$  vectors in the database. More specifically, given two groups of  $d$ -dimensional vectors  $\mathcal{W} = \{\mathbf{w}_1, \mathbf{w}_2, \dots, \mathbf{w}_m\}$  and  $\mathcal{H} = \{\mathbf{h}_1, \mathbf{h}_2, \dots, \mathbf{h}_n\}$ , the goal of MAD problem is to find the index pairs  $(i, j) \in \{1, \dots, m\} \times \{1, \dots, n\}$  who have the maximum or top- $K$  dot products. When  $m = 1$ , MAD problem reduces to the MIPS problem. MAD is also used in many recommender systems when we aim to find the best (user, item) among all the possible pairs.

We can use the same idea in Sampling-MIPS to solve the MAD problem. The only difference is the sampling procedure. In MIPS problem, we first sample  $t$ , then sample  $j$  conditioned on  $t$ . In MAD problem, we simply add one more step. We still sample  $t$  first, but then we sample  $i$  and  $j$  independently. We use a  $m$ -by- $d$  matrix  $W = [\mathbf{w}_1 \dots \mathbf{w}_m]^T$  to denote the set of  $m$  queries and use  $w_{it}$  to denote the  $t$ -th feature of the  $i$ -th query. Define  $P(t|W) \propto \sum_{i=1}^m |w_{it}| / \sum_{j=1}^n |h_{jt}|$ ,  $P(i|t) = \frac{|w_{it}|}{\sum_{i=1}^m |w_{it}|}$ , and  $P(j|t) = \frac{|h_{jt}|}{\sum_{j=1}^n |h_{jt}|}$ . We also assume that  $\sum_{i=1}^m |w_{it}| \neq 0$  and  $\sum_{j=1}^n |h_{jt}| \neq 0$  for all  $t$ . So we have

$$\begin{aligned} P(i, j|W) &= \sum_{t=1}^d P(i, j, t|W) \\ &= \sum_{t=1}^d P(i|t)P(j|t)P(t|W) \\ &\propto \sum_{t=1}^d |w_{it}h_{jt}|. \end{aligned}$$

Here, the distribution for sampling  $(i, j)$  is very similar to the distribution for sampling  $j$  in MIPS problem.

Similarly, alias table for sampling  $j$  can be constructed in pre-processing phase. In query-dependent phase, we only need to construct alias table for sampling  $t$  and  $i$ . Details are shown in Algorithm 5. The time complexity of each step of is also shown in Algorithm 5. The total time complexity is  $O(md + B + Cd)$ , while the naive time complexity is  $O(mnd)$ . We expect this algorithm to perform as well as it does in MIPS problem. The theoretical guarantee of this sampling MAD algorithm can also be proved in a similar manner as Sampling-MIPS.

---

#### Algorithm 5 Sampling-MAD

---

##### Pre-processing:

- 1:  $s_t \leftarrow \sum_{j=1}^n |h_{jt}|, \forall t = 1, \dots, d$
- 2:  $k_t \leftarrow \sum_{i=1}^m |w_{it}|, \forall t = 1, \dots, d$
- 3: Use alias table to construct

$$P(j|t) \leftarrow \text{multinomial}([|h_{1t}|, \dots, |h_{nt}|]), \forall t$$

##### Candidate Screening:

- 4: Use alias table to construct  $\dots O(md)$   
 $P(t|W) \leftarrow \text{multinomial}([|k_1 s_1|, \dots, |k_d s_d|])$   
 $P(i|t) \leftarrow \text{multinomial}([|w_{1t}|, \dots, |w_{mt}|]), \forall t$
- 5:  $\mathbf{x} = [x_{11} \dots, x_{mn}] \leftarrow [0, \dots, 0]$
- 6: Specify sample size  $B$
- 7: **for**  $b = 1, \dots, B$  **do**  $\dots O(B)$
- 8:     Use alias method to sample  $t \sim P(t|W)$
- 9:     Use alias method to sample  $i \sim P(i|t)$
- 10:    Use alias method to sample  $j \sim P(j|t)$
- 11:     $x_{ij} \leftarrow x_{ij} + \text{sgn}(w_{it}h_{jt})$

##### end for

##### Prediction Phase:

- 13: Find the biggest  $C$  elements in  $\mathbf{x}$ , i.e.,  $|\mathcal{C}(W)| = C$  and  $\mathcal{C}(W) \leftarrow \{(i, j) | x_{ij} \geq x_{i'j'}, \forall (i', j') \notin \mathcal{C}(W)\}$   
 $\dots O(B)$
  - 14: **for**  $(i, j) \in \mathcal{C}(W)$  **do**  $\dots O(Cd)$
  - 15:     Compute inner product  $\mathbf{w}_i^T \mathbf{h}_j$
  - 16: **end for**
  - 17: Output: indexes of the top- $K$  elements of  $\{\mathbf{w}_i^T \mathbf{h}_j | (i, j) \in \mathcal{C}(W)\}$   $\dots O(C)$
- 

#### 8.3.2 Mathematical analysis of Sampling-MAD

We also have the similar theoretical results for MAD problem. We omit the proofs since they are very similar to Lemma 1, 2, Theorem 1, 2 and Corollary 1 for the MIPS case.

**Lemma 3.** Define  $x_{ij,b} = \text{sgn}(w_{it}h_{jt})$  if index pair  $(i, j, t)$  is sampled in the  $b$ -th sampling step,  $x_{ij,b} = 0$  otherwise.

Note that  $x_{ij} = \sum_{b=1}^B x_{ij,b}$ . Define

$$S = \sum_{t=1}^d \sum_{i=1}^m \sum_{j=1}^n |w_{it}h_{jt}|,$$

then we have

$$E[x_{ij,b}] = \frac{\mathbf{w}_i^T \mathbf{h}_j}{S}$$

and

$$E[x_{ij}] = \frac{B \mathbf{w}_i^T \mathbf{h}_j}{S}.$$

We can then show the ranking of  $x_{ij}$ 's will be correct when we have enough samples.

**Lemma 4.** Define  $A_{ij} = \sum_{t=1}^d |w_{it}h_{jt}|$ , then  $E[(x_{ij,b} - x_{i'j',b})^2] = \frac{A_{ij} + A_{i'j'}}{S}, \forall (i, j) \neq (i', j')$ . Therefore, from

Lemma 3, we have

$$\begin{aligned} & \text{Var}(x_{ij,b} - x_{i'j',b}) \\ &= \frac{A_{ij} + A_{i'j'}}{S} - \frac{(\mathbf{w}_i^T \mathbf{h}_j - \mathbf{w}_{i'}^T \mathbf{h}_{j'})^2}{S^2} \end{aligned}$$

and  $\text{Var}(x_{ij} - x_{i'j'}) = B \text{Var}(x_{ij,b} - x_{i'j',b})$ .

**Theorem 3.** For some index pair  $(I, J)$ , define for  $(i, j) \in \{(i, j) : \mathbf{w}_i^T \mathbf{h}_j < \mathbf{w}_I^T \mathbf{h}_J\}$ :

$$\begin{aligned} N &= \#\{(i, j) : \mathbf{w}_i^T \mathbf{h}_j < \mathbf{w}_I^T \mathbf{h}_J\} \text{ (assume } N \neq 0\text{)}, \\ \Lambda_{ij} &= \frac{\mathbf{w}_I^T \mathbf{h}_J - \mathbf{w}_i^T \mathbf{h}_j}{S}, \\ \Lambda &= \min_{\{(i,j): \mathbf{w}_i^T \mathbf{h}_j < \mathbf{w}_I^T \mathbf{h}_J\}} \Lambda_{ij}, \\ T_{ij} &= \frac{(S + \mathbf{w}_I^T \mathbf{h}_J - \mathbf{w}_i^T \mathbf{h}_j)(\mathbf{w}_I^T \mathbf{h}_J - \mathbf{w}_i^T \mathbf{h}_j)}{S^2}, \\ M_{ij} &= \frac{S^2}{(S + \mathbf{w}_I^T \mathbf{h}_J - \mathbf{w}_i^T \mathbf{h}_j)^2}, \\ \sigma_{ij}^2 &= \text{Var}(x_{ij,b} - x_{IJ,b}). \end{aligned}$$

If sample size  $B$  satisfies the following equation for all  $(i, j) \neq (I, J)$ ,

$$B \geq \frac{\log \frac{N}{\delta}}{M_{ij} \sigma_{ij}^2 \left[ \left(1 + \frac{T_{ij}}{\sigma_{ij}^2}\right) \log \left(1 + \frac{T_{ij}}{\sigma_{ij}^2}\right) - \frac{T_{ij}}{\sigma_{ij}^2} \right]}, \quad (19)$$

implying that  $B \sim O\left(\frac{1}{\Lambda} \log(N)\right)$ , then with error probability  $\delta \in (0, 1)$ , we have

$$P(x_{IJ} > x_{ij}, \forall (i, j) \in \{\mathbf{w}_i^T \mathbf{h}_j < \mathbf{w}_I^T \mathbf{h}_J\}) \geq 1 - \delta.$$

Similar to MIPS problem, when  $\mathbf{w}_I^T \mathbf{h}_J$  has the maximum inner product,  $N$  in the theorem above can be replaced by  $mn$ . That means that sample size  $B = O\left(\frac{1}{\Lambda} \log(mn)\right)$  is sufficient for identifying the maximum inner product in MAD problem and  $\Lambda < 1$  here.

**Theorem 4.** Assume  $w_{it}h_{jt} \geq 0$ , for all  $(i, j, t) \in \{1, \dots, m\} \times \{1, \dots, n\} \times \{1, \dots, d\}$  and  $\mathbf{w}_i^T \mathbf{h}_j \stackrel{iid}{\sim} \text{Exp}(\beta)$ . In Sampling-MAD algorithm, if we take  $C = B$ , where  $C$  means we calculate inner products of indexes with top- $C$  scores, then when  $B \geq \frac{\rho}{\alpha} mn$ , where  $\alpha \in (0, \frac{1}{2})$  and  $\rho \in (0, \frac{\alpha d(n-1)}{(d+1)n})$ ,

$$P(\text{not identifying maximum inner product}) \leq O\left(\frac{1}{(mn)^\rho}\right).$$

Therefore, the overall time complexity of Sampling-MAD is  $O(md + B + Bd) = O(md + \frac{\rho}{\alpha}(d+1)mn) < O(mnd)$ .

**Corollary 2.** Assume  $w_{it}h_{jt} \geq 0$ , for all  $(i, j, t) \in \{1, \dots, m\} \times \{1, \dots, n\} \times \{1, \dots, d\}$ . If  $\mathcal{F}$  is a continuous, non-negative, heavy-tailed distribution,  $\mathbf{w}_i^T \mathbf{h}_j \stackrel{iid}{\sim} \mathcal{F}$  and  $E[(\mathbf{w}_i^T \mathbf{h}_j)^2] < \infty$ , then when  $B \geq \frac{\rho}{\alpha} mn$ , where
